# Supplementary material for: Morphine‐mediated release of miR‐138 in astrocyte‐derived extracellular vesicles promotes microglial activation
Source: PubMed Central journal article supplement (PMC7710131; doi:10.1002/jev2.12027), 2020-11-19

### Mouse primary astrocytes

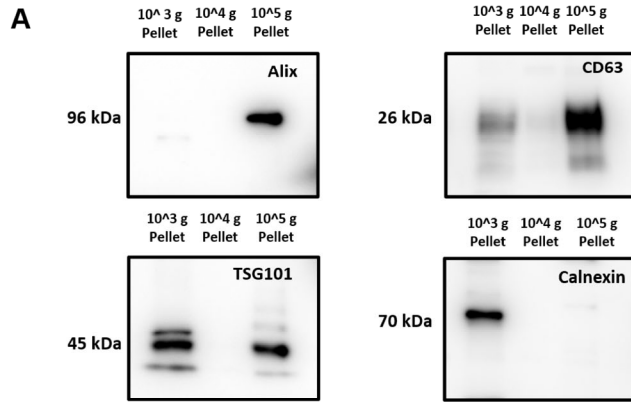

### Mouse primary astrocytes

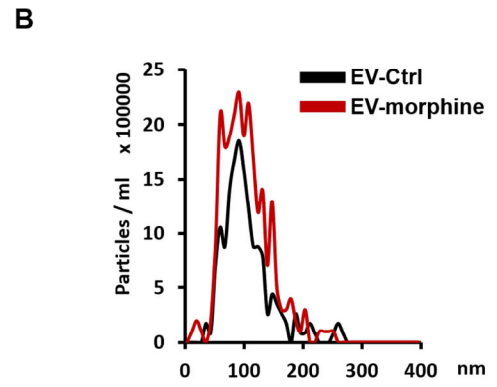

### A172 astrocytes

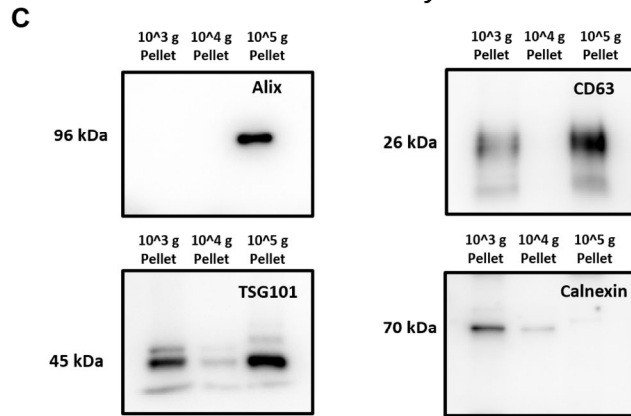

### A172 astrocytes

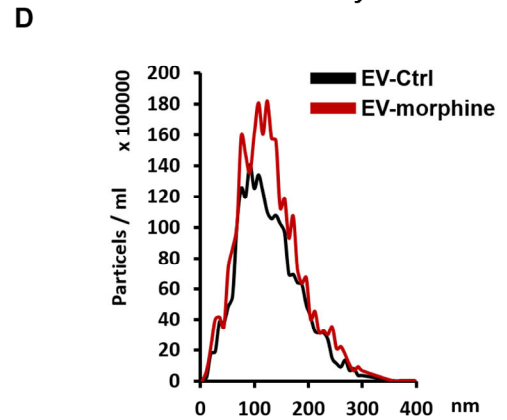

### Human primary astrocytes

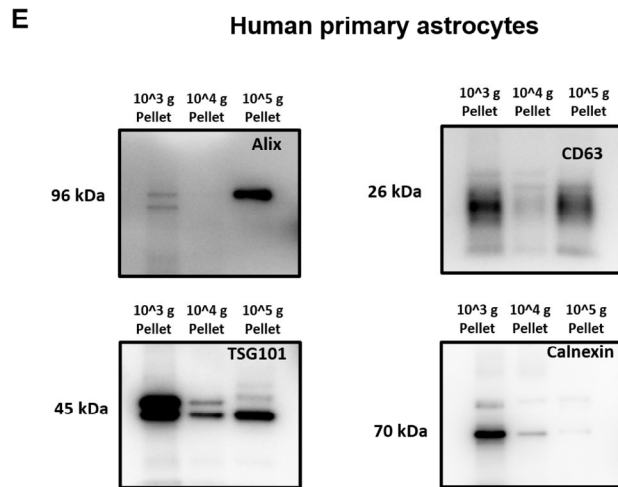

### Human primary astrocytes

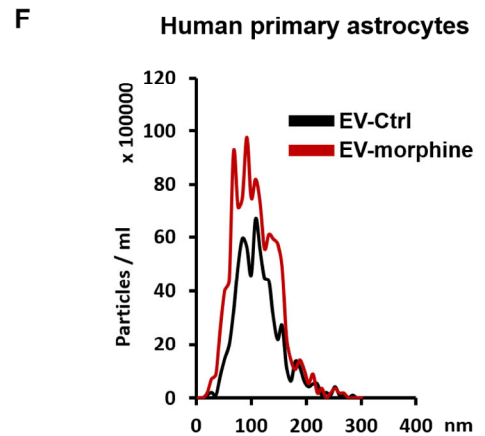

**G**

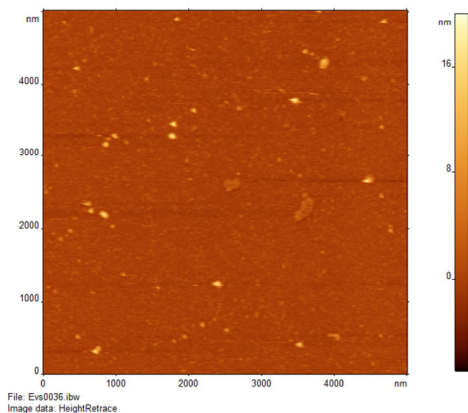

Supplement: JEV2-10-e12027-s002.pdf [file JEV2-10-e12027-s002.pdf]
