# Supplementary material for: Morphine‐mediated release of miR‐138 in astrocyte‐derived extracellular vesicles promotes microglial activation
Source: PubMed Central journal article supplement (PMC7710131; doi:10.1002/jev2.12027), 2020-11-19

A.

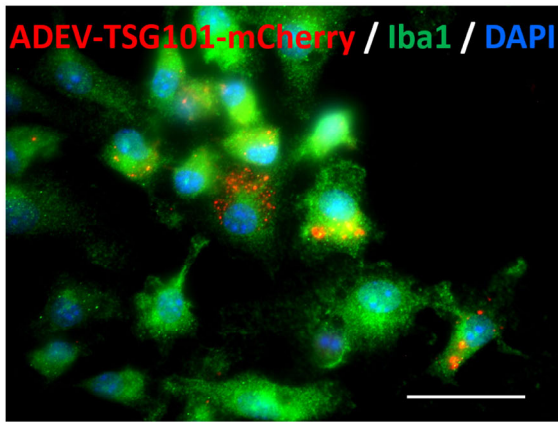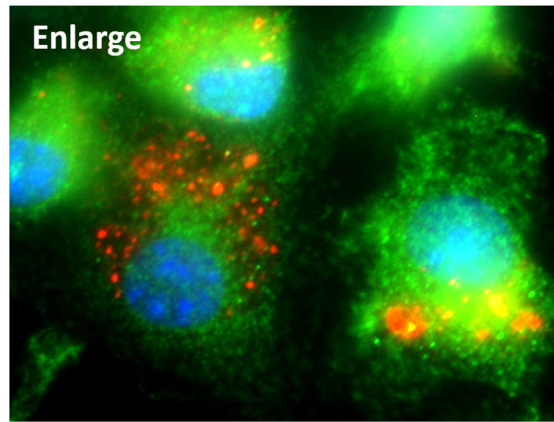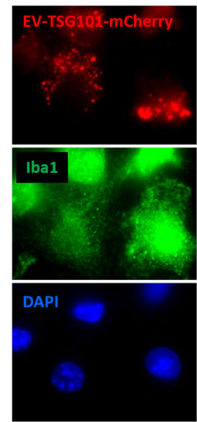

B.

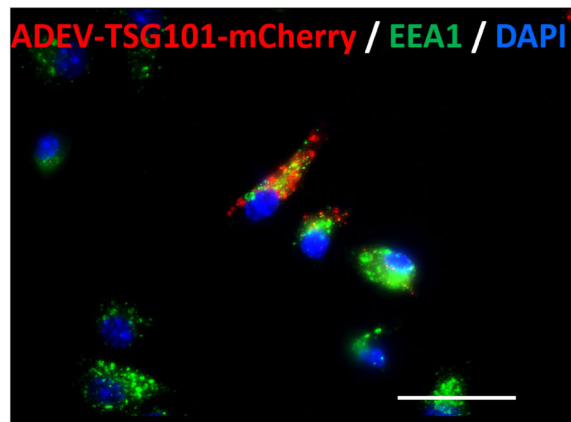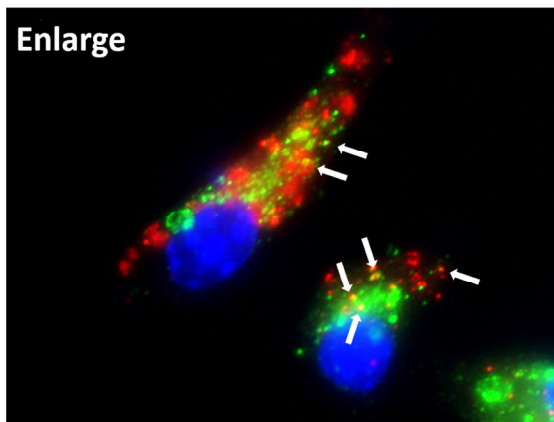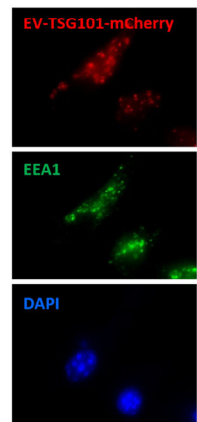

C. ADEV + (Cy5-miR138+RNaseA)

(ADEV-Cy5-miR138) + RNaseA

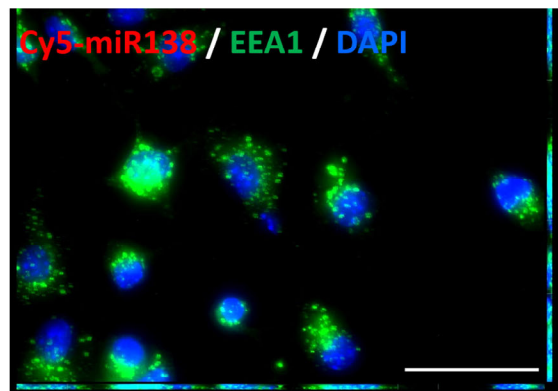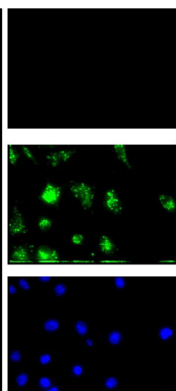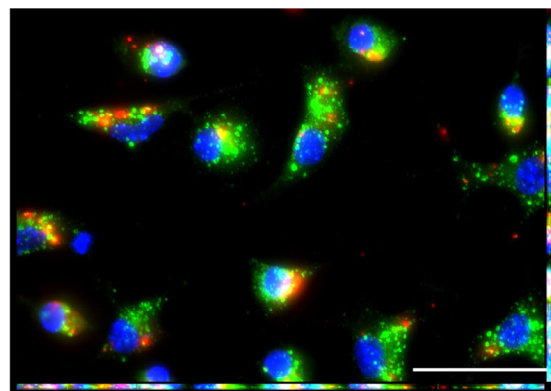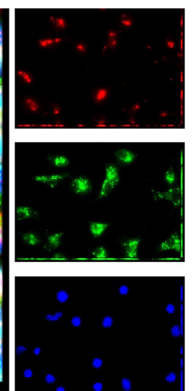

Supplement: JEV2-10-e12027-s003.pdf [file JEV2-10-e12027-s003.pdf]
