# Supplementary material for: Morphine‐mediated release of miR‐138 in astrocyte‐derived extracellular vesicles promotes microglial activation
Source: PubMed Central journal article supplement (PMC7710131; doi:10.1002/jev2.12027), 2020-11-19

**A.****Cytoplasm**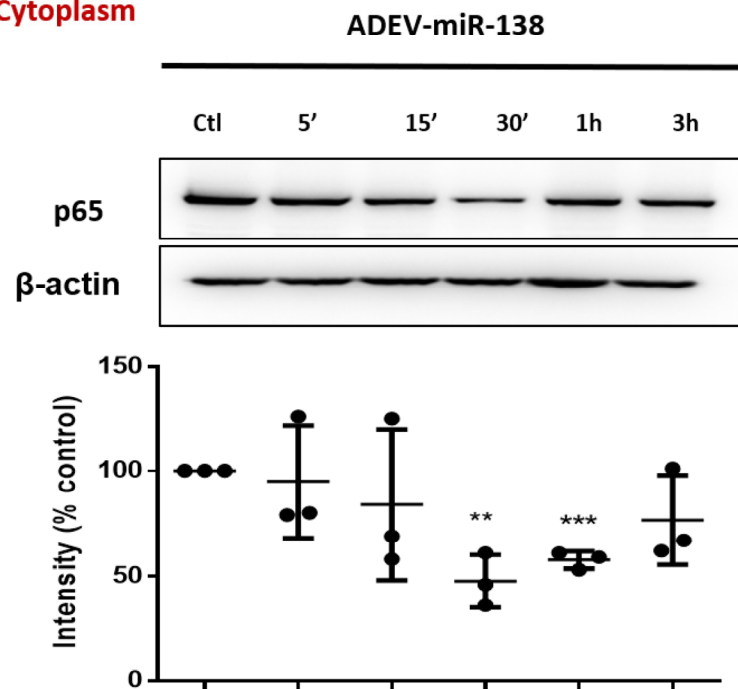**B.****Nucleus**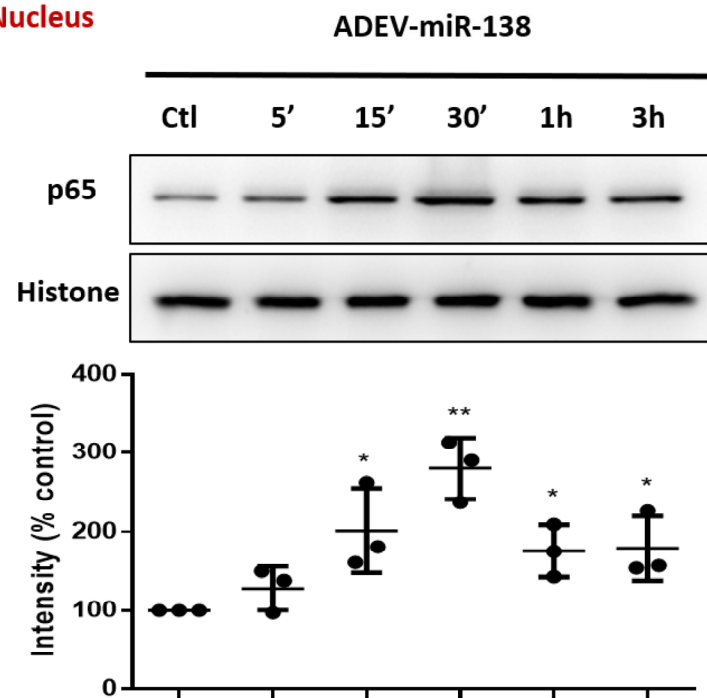

Supplement: JEV2-10-e12027-s005.pdf [file JEV2-10-e12027-s005.pdf]
